# Supplementary material
Source: PubMed Central journal article supplement (PMC6286256)
Supplement: NIHMS974436-supplement-Supplementary_Material.pdf [file NIHMS974436-supplement-Supplementary_Material.pdf]

## Supplementary materials

### *Supplementary results*

#### **Single-agent BEZ235**

##### *Metabolic responses by FDG-PET*

- The percent change from baseline in the maximum standardized uptake values (SUV<sub>max</sub>) of 18-fluoro deoxyglucose (18-FDG) was assessed by FDG-PET in cycle 1 and at the end of cycle 2. In cycle 1, 13 patients out of the 26 evaluable patients had a decrease in SUV<sub>max</sub> (50%; Supplementary Figure 1A), including 8 who had a partial metabolic response (PMR, defined as  $\geq 25\%$  decrease from baseline in SUV<sub>max</sub> in the absence of new lesions). Of these 8 patients, 3 had SD, 3 had progressive disease (PD), and 2 had unknown overall tumor response by RECIST v1.0. In addition, 3 of the 8 patients who had PMR had a PI3K pathway alteration: PTEN null/low expression was observed in 1 patient and *PIK3CA* mutation was observed in 2 patients (Supplementary Figure 1A).
- At the end of cycle 2, 5 of the 16 evaluable patients had a decrease in SUV<sub>max</sub> (31.3%; Supplementary Figure 1A), including 4 patients with PMR, all of whom had SD as overall tumor response by RECIST v1.0. Of the 4 patients with PMR, 1 had a PI3K pathway alteration with a PTEN null/low expression (Supplementary Figure 1A).

#### **BEZ235 in combination with trastuzumab**

##### *Metabolic responses by FDG-PET*

- Change in SUV<sub>max</sub> by FDG-PET was assessed at the end of cycle 2. A decrease in SUV<sub>max</sub> was observed in 5 of 8 evaluable patients (62.5%; Supplementary Figure 1B), including 3 patients with PMR. Of these 3, 1 patient had a PR and two patients had SD as best overall response by RECIST v1.0.

For the 3 patients with PMR, 1 patient with PMR had a PI3K pathway alteration by central assessment (*PIK3CA* mutation H1047R in Exon 20; [Supplementary Figure IB](#)); the 2 additional patients were enrolled on the basis of locally assessed PI3K pathway alterations (*PIK3CA* mutation, *PTEN* null/low expression)

**Supplementary Table 1A** Summary of primary PK parameters for single-agent BEZ235 HGC formulation

| BEZ235 cohort     | Dose level         | PK parameter (unit)             | Cycle 1, Day 1 | Cycle 1, Day 8 | Cycle 1, Day 28 |
|-------------------|--------------------|---------------------------------|----------------|----------------|-----------------|
| HGC fast (N = 41) | 10 mg/day (N = 3)  | AUC <sub>(0-24)</sub> (h*ng/mL) | 21.71 (2)      | 33.13 (3)      | 26.51 (3)       |
|                   |                    | C <sub>max</sub> (ng/ml)        | 13.30 (3)      | 9.29 (3)       | 5.27 (3)        |
|                   |                    | t <sub>1/2</sub> (h)            | –              | –              | –               |
|                   |                    | T <sub>max</sub> (h)            | 2.00 (3)       | 3.00 (3)       | 4.00 (3)        |
|                   | 25 mg/day (N = 6)  | AUC <sub>(0-24)</sub> (h*ng/mL) | 20.98 (6)      | 24.71 (6)      | 18.92 (3)       |
|                   |                    | C <sub>max</sub> (ng/ml)        | 12.15 (6)      | 10.54 (6)      | 12.13 (3)       |
|                   |                    | t <sub>1/2</sub> (h)            | –              | –              | –               |
|                   |                    | T <sub>max</sub> (h)            | 1.00 (6)       | 1.30 (6)       | 1.25 (3)        |
|                   | 50 mg/day (N = 4)  | AUC <sub>(0-24)</sub> (h*ng/mL) | 70.75 (4)      | 80.82 (4)      | 63.40 (4)       |
|                   |                    | C <sub>max</sub> (ng/mL)        | 16.35 (4)      | 21.05 (4)      | 15.81 (4)       |
|                   |                    | t <sub>1/2</sub> (h)            | –              | –              | –               |
|                   |                    | T <sub>max</sub> (h)            | 2.29 (4)       | 2.31 (4)       | 1.55 (4)        |
|                   | 100 mg/day (N = 6) | AUC <sub>(0-24)</sub> (h*ng/mL) | 54.94 (5)      | 149.85 (6)     | 125.06 (5)      |
|                   |                    | C <sub>max</sub> (ng/mL)        | 14.10 (6)      | 37.80 (6)      | 28.15 (6)       |
|                   |                    | t <sub>1/2</sub> (h)            | –              | –              | –               |
|                   |                    | T <sub>max</sub> (h)            | 2.54 (6)       | 2.49 (6)       | 1.34 (6)        |

| BEZ235 cohort    | Dose level          | PK parameter (unit)             | Cycle 1, Day 1 | Cycle 1, Day 8 | Cycle 1, Day 28 |
|------------------|---------------------|---------------------------------|----------------|----------------|-----------------|
|                  | 200 mg/day (N = 5)  | AUC <sub>(0-24)</sub> (h*ng/mL) | 534.17 (5)     | 209.76 (5)     | 379.96 (4)      |
|                  |                     | C <sub>max</sub> (ng/mL)        | 71.50 (5)      | 51.20 (5)      | 43.40 (4)       |
|                  |                     | t <sub>1/2</sub> (h)            | –              | –              | –               |
|                  |                     | T <sub>max</sub> (h)            | 2.00 (5)       | 2.00 (5)       | 3.61 (4)        |
|                  | 300 mg/day (N = 6)  | AUC <sub>(0-24)</sub> (h*ng/mL) | 213.92 (5)     | 536.27 (6)     | 437.47 (4)      |
|                  |                     | C <sub>max</sub> (ng/mL)        | 15.80 (6)      | 66.95 (6)      | 144.00 (5)      |
|                  |                     | t <sub>1/2</sub> (h)            | –              | –              | –               |
|                  |                     | T <sub>max</sub> (h)            | 3.02 (6)       | 3.50 (6)       | 3.77 (5)        |
|                  | 400 mg/day (N = 11) | AUC <sub>(0-24)</sub> (h*ng/mL) | 260.43 (10)    | 202.14 (9)     | 1201.96 (8)     |
|                  |                     | C <sub>max</sub> (ng/mL)        | 32.50 (11)     | 42.60 (10)     | 183.15 (8)      |
|                  |                     | t <sub>1/2</sub> (h)            | –              | –              | –               |
|                  |                     | T <sub>max</sub> (h)            | 2.97 (11)      | 2.58 (10)      | 5.00 (8)        |
| HGC fed (N = 18) | 300 mg/day (N = 6)  | AUC <sub>(0-24)</sub> (h*ng/mL) | 680.39 (6)     | 3208.65 (6)    | 5781.64 (4)     |
|                  |                     | C <sub>max</sub> (ng/mL)        | 120.50 (6)     | 418.00 (6)     | 301.00 (5)      |
|                  |                     | t <sub>1/2</sub> (h)            | –              | –              | –               |
|                  |                     | T <sub>max</sub> (h)            | 3.98 (6)       | 3.95 (6)       | 6.00 (5)        |
|                  | 400 mg/day (N = 3)  | AUC <sub>(0-24)</sub> (h*ng/mL) | 544.65 (3)     | 1766.88 (2)    | 406.71 (3)      |
|                  |                     | C <sub>max</sub> (ng/mL)        | 94.70 (3)      | 50.10 (3)      | 40.80 (3)       |
|                  |                     | t <sub>1/2</sub> (h)            | –              | –              | –               |

| BEZ235 cohort | Dose level          | PK parameter (unit)             | Cycle 1, Day 1 | Cycle 1, Day 8 | Cycle 1, Day 28 |
|---------------|---------------------|---------------------------------|----------------|----------------|-----------------|
|               | 700 mg/day (N = 5)  | T <sub>max</sub> (h)            | 4.50 (3)       | 3.00 (3)       | 2.08 (3)        |
|               |                     | AUC <sub>(0-24)</sub> (h*ng/mL) | 1253.47 (4)    | 11380.24 (4)   | 4385.64 (4)     |
|               |                     | C <sub>max</sub> (ng/mL)        | 116.00 (5)     | 926.00 (5)     | 421.75 (4)      |
|               |                     | t <sub>1/2</sub> (h)            | –              | –              | –               |
|               |                     | T <sub>max</sub> (h)            | 4.02 (5)       | 4.17 (5)       | 4.63 (4)        |
|               | 1100 mg/day (N = 4) | AUC <sub>(0-24)</sub> (h*ng/mL) | 280.92 (3)     | 931.22 (4)     | 604.35 (1)      |
|               |                     | C <sub>max</sub> (ng/mL)        | 275.90 (4)     | 100.35 (4)     | 46.10 (1)       |
|               |                     | t <sub>1/2</sub> (h)            | –              | –              | –               |
|               |                     | T <sub>max</sub> (h)            | 7.22 (4)       | 4.50 (4)       | 4.00 (1)        |

*HGC* hard gelatine capsule; *PK* pharmacokinetics;

All data shown as median (n).

**Supplementary Table 1B** Summary of primary PK parameters for single-agent BEZ235 SDS formulation

| BEZ235 cohort          | Dose level           | PK parameter (unit)             | Cycle 1, Day 1 | Cycle 1, Day 8 | Cycle 1, Day 28 |
|------------------------|----------------------|---------------------------------|----------------|----------------|-----------------|
| SDS capsule A (N = 22) | 400 mg/day (N = 5)   | AUC <sub>(0-24)</sub> (h*ng/mL) | 2247.84 (2)    | 10201.24 (4)   | 19555.36 (2)    |
|                        |                      | C <sub>max</sub> (ng/mL)        | 131.00 (5)     | 982.00 (5)     | 826.00 (4)      |
|                        |                      | t <sub>1/2</sub> (h)            | 3.72 (2)       | 4.20 (4)       | 2.61 (2)        |
|                        |                      | T <sub>max</sub> (h)            | 4.00 (5)       | 4.00 (5)       | 5.00 (4)        |
|                        | 800 mg/day (N = 6)   | AUC <sub>(0-24)</sub> (h*ng/mL) | 2543.6 (3)     | 19769.65 (4)   | 25404.92 (2)    |
|                        |                      | C <sub>max</sub> (ng/mL)        | 164.00 (6)     | 1000.00 (5)    | 1940.00 (4)     |
|                        |                      | t <sub>1/2</sub> (h)            | 21.20 (1)      | 11.87 (2)      | 4.11 (1)        |
|                        |                      | T <sub>max</sub> (h)            | 6.00 (6)       | 6.00 (5)       | 4.00 (4)        |
|                        | 1000 mg/day (N = 11) | AUC <sub>(0-24)</sub> (h*ng/mL) | 2906.34 (9)    | 11725.47 (8)   | 14087.89 (4)    |
|                        |                      | C <sub>max</sub> (ng/mL)        | 309.00 (11)    | 929.50 (10)    | 701.00 (6)      |
|                        |                      | t <sub>1/2</sub> (h)            | 4.02 (6)       | 5.10 (2)       | 4.10 (2)        |
|                        |                      | T <sub>max</sub> (h)            | 6.00 (11)      | 6.00 (10)      | 4.00 (6)        |
| SDS sachet (N = 61)    | 800 mg/day (N = 6)   | AUC <sub>(0-24)</sub> (h*ng/mL) | 982.4 (6)      | 6959.56 (3)    | 5888.51 (3)     |
|                        |                      | C <sub>max</sub> (ng/mL)        | 191.00 (6)     | 814.00 (3)     | 668.00 (3)      |
|                        |                      | t <sub>1/2</sub> (h)            | 6.72 (5)       | 6.67 (2)       | 4.67 (3)        |
|                        |                      | T <sub>max</sub> (h)            | 1.53 (6)       | 4.00 (3)       | 2.03 (3)        |
|                        | 1000 mg/day (N = 10) | AUC <sub>(0-24)</sub> (h*ng/mL) | 5685.26 (10)   | 19423.08 (8)   | 1357.59 (5)     |
|                        |                      | C <sub>max</sub> (ng/mL)        | 489.50 (10)    | 1280.00 (9)    | 1280.00 (5)     |

| BEZ235 cohort            | Dose level             | PK parameter (unit)             | Cycle 1, Day 1                  | Cycle 1, Day 8 | Cycle 1, Day 28 |
|--------------------------|------------------------|---------------------------------|---------------------------------|----------------|-----------------|
|                          |                        | t <sub>1/2</sub> (h)            | 5.01 (5)                        | 9.68 (5)       | 5.89 (5)        |
|                          |                        | T <sub>max</sub> (h)            | 5.04 (10)                       | 4.07 (9)       | 4.00 (5)        |
|                          | 1200 mg/day (N = 24)   | AUC <sub>(0-24)</sub> (h*ng/mL) | 1895.69 (17)                    | 13113.03 (18)  | 17996.82 (15)   |
|                          |                        | C <sub>max</sub> (ng/mL)        | 194.50 (20)                     | 1195.00 (20)   | 1335.00 (16)    |
|                          |                        | t <sub>1/2</sub> (h)            | 5.33 (13)                       | 6.42 (12)      | 6.03 (12)       |
|                          |                        | T <sub>max</sub> (h)            | 4.01 (20)                       | 4.00 (20)      | 3.04 (16)       |
|                          |                        |                                 |                                 |                |                 |
|                          | 1400 mg/day (N = 14)   | AUC <sub>(0-48)</sub> (h*ng/mL) | 5291.62 (9)                     | 7622.28 (5)    | 18043.24 (5)    |
|                          |                        | C <sub>max</sub> (ng/mL)        | 441.00 (13)                     | 1180.50 (6)    | 1010.00 (5)     |
|                          |                        | t <sub>1/2</sub> (h)            | 4.97 (6)                        | 5.69 (3)       | 11.03 (4)       |
|                          |                        | T <sub>max</sub> (h)            | 7.98 (13)                       | 5.01 (6)       | 4.00 (5)        |
|                          | 1600 mg/day (N = 7)    | AUC <sub>(0-24)</sub> (h*ng/mL) | 2563.78 (7)                     | 23828.46 (6)   | 13729.30 (4)    |
|                          |                        | C <sub>max</sub> (ng/mL)        | 251.00 (7)                      | 1900.00 (7)    | 977.00 (5)      |
|                          |                        | t <sub>1/2</sub> (h)            | 4.29 (4)                        | 3.81 (3)       | 3.85 (3)        |
|                          |                        | T <sub>max</sub> (h)            | 6.00 (7)                        | 5.93 (7)       | 4.00 (5)        |
|                          | SDS capsule B (N = 11) | 800 mg/day                      | AUC <sub>(0-24)</sub> (h*ng/mL) | 1855.39 (10)   | 2960.60 (10)    |
| C <sub>max</sub> (ng/mL) |                        |                                 | 243.00 (11)                     | 298.00 (10)    | 446.50 (8)      |
| t <sub>1/2</sub> (h)     |                        |                                 | 4.85 (6)                        | 5.53 (7)       | 7.08 (5)        |
| T <sub>max</sub> (h)     |                        |                                 | 4.00 (11)                       | 5.00 (10)      | 4.00 (8)        |

All data shown as median (n). PK pharmacokinetic; SDS solid dispersion system.

**Supplementary Table 1C** Summary of primary PK parameters for BEZ235 SDS + trastuzumab

| BEZ235 cohort                              | PK parameter (unit)             | Cycle 1, Day 1 | Cycle 1, Day 8 | Cycle 1, Day 28 |
|--------------------------------------------|---------------------------------|----------------|----------------|-----------------|
| SDS capsule A<br>400 mg/day + T<br>(N = 3) | AUC <sub>(0-24)</sub> (h*ng/mL) | 5515.94 (1)    | 29681.34 (3)   | 8604.48 (2)     |
|                                            | C <sub>max</sub> (ng/mL)        | 352.00 (3)     | 1630.00 (3)    | 1350.00 (3)     |
|                                            | t <sub>1/2</sub> (h)            | -              | 12.64 (3)      | 6.48 (2)        |
|                                            | T <sub>max</sub> (h)            | 6.05 (3)       | 6.00 (3)       | 4.00 (3)        |
| SDS sachet<br>600 mg/day + T (N = 17)      | AUC <sub>(0-24)</sub> (h*ng/mL) | 4331.95 (15)   | 13419.26 (15)  | 7756.11 (14)    |
|                                            | C <sub>max</sub> (ng/mL)        | 346.00 (16)    | 998.00 (15)    | 625.00 (15)     |
|                                            | t <sub>1/2</sub> (h)            | 5.12 (10)      | 5.89 (9)       | 5.73 (11)       |
|                                            | T <sub>max</sub> (h)            | 4.23 (16)      | 4.07 (15)      | 4.00 (15)       |
| SDS sachet<br>800 mg/day + T (N = 9)       | AUC <sub>(0-24)</sub> (h*ng/mL) | 6830.65 (8)    | 18805.82 (6)   | 13197.57 (3)    |
|                                            | C <sub>max</sub> (ng/mL)        | 606.00 (10)    | 1185.00 (6)    | 1130.00 (3)     |
|                                            | t <sub>1/2</sub> (h)            | 5.31 (3)       | 8.00 (4)       | 6.77 (3)        |
|                                            | T <sub>max</sub> (h)            | 6.96 (10)      | 4.04 (6)       | 4.00 (3)        |

All data shown as median (n).

PK pharmacokinetic; SDS solid dispersion system; T trastuzumab.

**Supplementary Table 2** Summary of posterior distribution of DLT rates at time of MTD, dose determining analysis set

|                                                   | Declared MTD                               | Posterior probabilities that Pr (DLT) is in interval |           |        | Mean  | SD    | Quantiles |       |       |
|---------------------------------------------------|--------------------------------------------|------------------------------------------------------|-----------|--------|-------|-------|-----------|-------|-------|
|                                                   |                                            | 0-0.16                                               | 0.16-0.33 | 0.33-1 |       |       | 2.5%      | 50%   | 97.5% |
| Single-agent BEZ235 SDS sachet                    | 1200 mg/day                                | 0.036                                                | 0.790     | 0.174  | 0.269 | 0.066 | 0.152     | 0.265 | 0.406 |
| BEZ235 SDS sachet in combination with trastuzumab | 600 mg/day +<br>trastuzumab<br>2 mg/kg/day | 0.261                                                | 0.609     | 0.130  | 0.224 | 0.091 | 0.079     | 0.214 | 0.43  |

*DLT* dose-limiting toxicity; *MTD* maximum tolerated dose; *Pr* probability; *SD* standard deviation; *SDS* solid dispersion system.



**Supplementary Table 3** Patient disposition and deaths

|                                    | Single-agent<br>SDS capsule A<br><br>N = 22 | Single-agent<br>SDS sachet<br><br>N = 61 | All SDS<br>+ trastuzumab<br><br>N = 30 <sup>a</sup> |
|------------------------------------|---------------------------------------------|------------------------------------------|-----------------------------------------------------|
| Primary reason for discontinuation |                                             |                                          |                                                     |
| Adverse event                      | 1 (4.5)                                     | 14 (23.0)                                | 5 (16.7)                                            |
| Disease progression                | 20 (90.9)                                   | 44 (72.1)                                | 22 (73.3)                                           |
| Withdrew consent                   | 1 (4.5)                                     | 3 (4.9)                                  | 3 (10)                                              |
| Deaths                             |                                             |                                          |                                                     |
| Total                              | 5 (22.7)                                    | 3 (4.9)                                  | 3 (10.0)                                            |
| On-treatment                       | 4 (18.2)                                    | 3 (4.9)                                  | 2 (6.7)                                             |

SDS solid dispersion system; T trastuzumab.

All data shown as n (%) unless stated otherwise.

<sup>a</sup>Of the 30 treated patients in this group, 1 patient had a serious adverse event of myocardial ischemia on cycle 1 day 1 and discontinued the study without receiving a dose of trastuzumab, and after only a single dose of 800 mg BEZ235 SDS sachet.

**Supplementary Table 4** Biomarkers in tumor tissue from paired biopsies

| Patient | Dose cohort                               | Treatment duration | Reason for discontinuation | Timepoint      | Change from baseline (%) |        |                     |         |                    |         |        |           |        |
|---------|-------------------------------------------|--------------------|----------------------------|----------------|--------------------------|--------|---------------------|---------|--------------------|---------|--------|-----------|--------|
|         |                                           |                    |                            |                | Ki67                     | pAKT   | pAKT <sup>473</sup> | pS6     | pS6 <sup>253</sup> | PARP    | p4EBP1 | cyclin D1 | pERK   |
| A       | SDS capsule A<br>800 mg/day               | 2 cycles           | Disease progression        | Cycle 2 day 28 | -26.32                   | -      | 16.67               | -26.92  | -                  | -100.00 | +26.67 | -         | -      |
| B       | SDS capsule A<br>1000 mg/day              | 3 cycles           | Disease progression        | Cycle 1 day 28 | -66.67                   | -42.50 | -                   | +86.85  | -                  | -       | 0      | -6.25     | +47.37 |
|         |                                           |                    |                            | Cycle 3 day 28 | -66.67                   | +40.00 | -                   | +107.61 | -                  | -       | +33.33 | +6.25     | +50.00 |
| C       | SDS sachet<br>1200 mg/day                 | 1.5 cycles         | Adverse event              | Cycle 1 day 28 | -                        | -      | -                   | -       | -                  | -       | 0.00   | -         | -      |
| D       | SDS sachet<br>600 mg/day +<br>trastuzumab | 1.5 cycles         | Disease progression        | Cycle 1 day 28 | -                        | +35.71 | -                   | +2.33   | +11.00             | -       | -      | -         | -      |

SDS solid dispersion system.

**Supplementary Fig. 1** Percentage change from baseline by FDG-PET

A. Single-agent BEZ235 SDS sachet (To be re-drawn in high-res closer to submission)

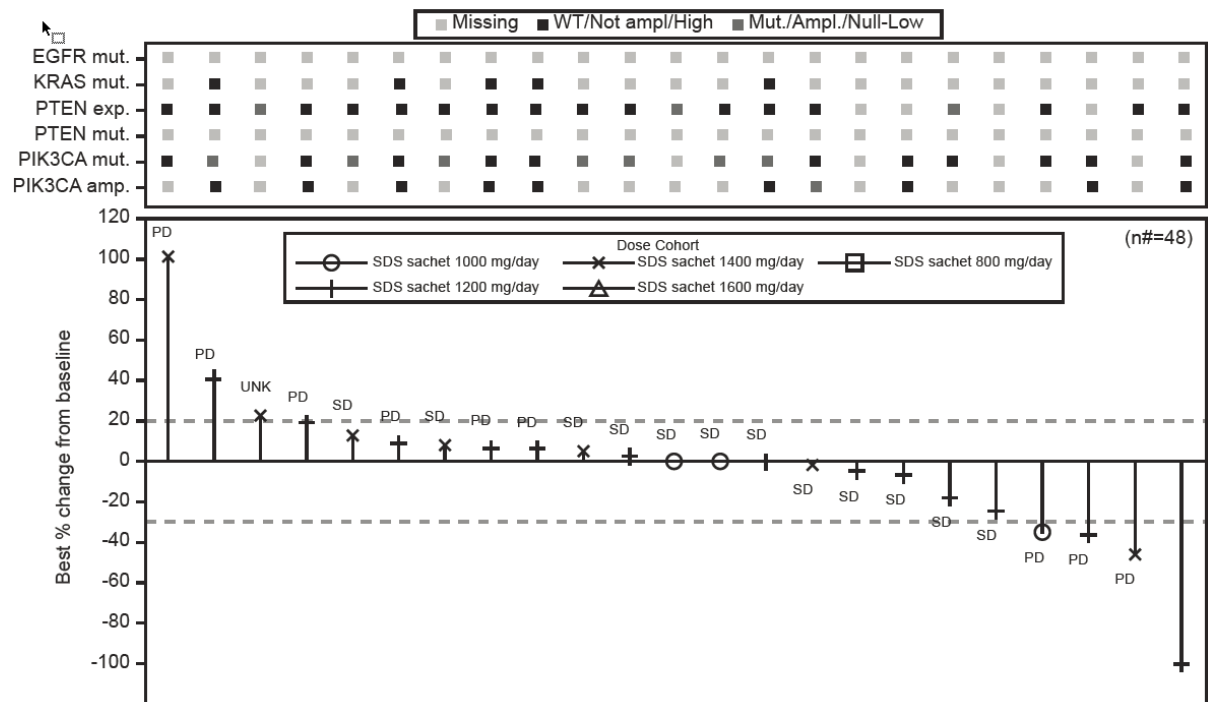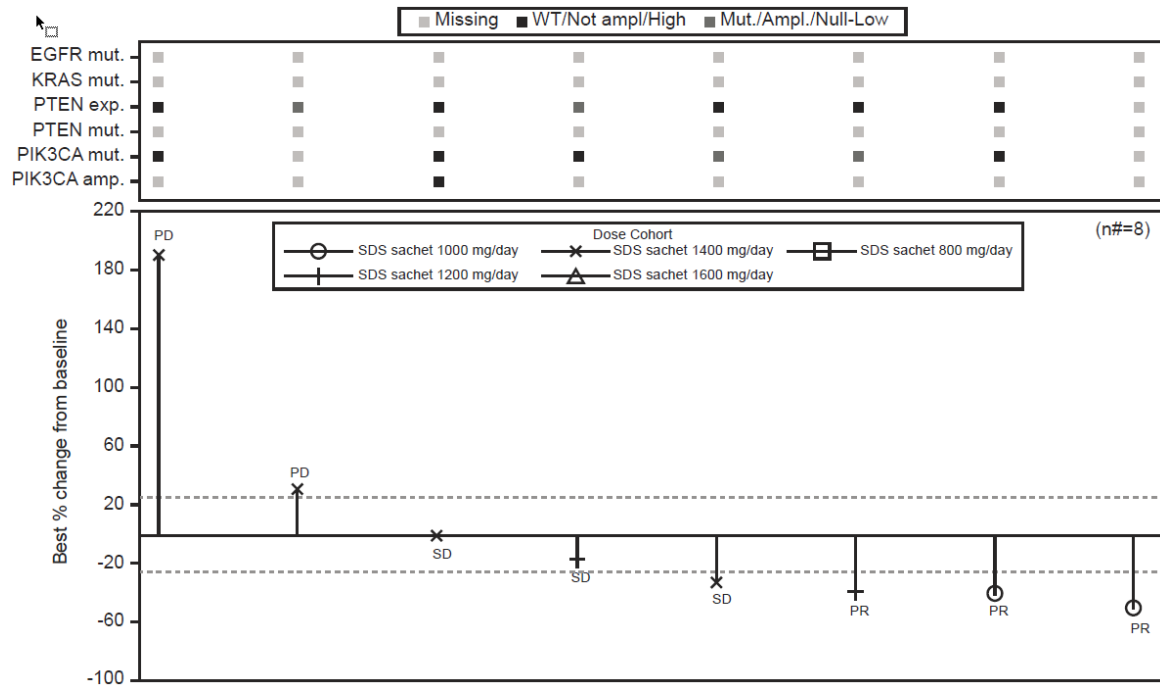

**B. BEZ235 in combination with trastuzumab (To be re-drawn in high-res closer to submission)**

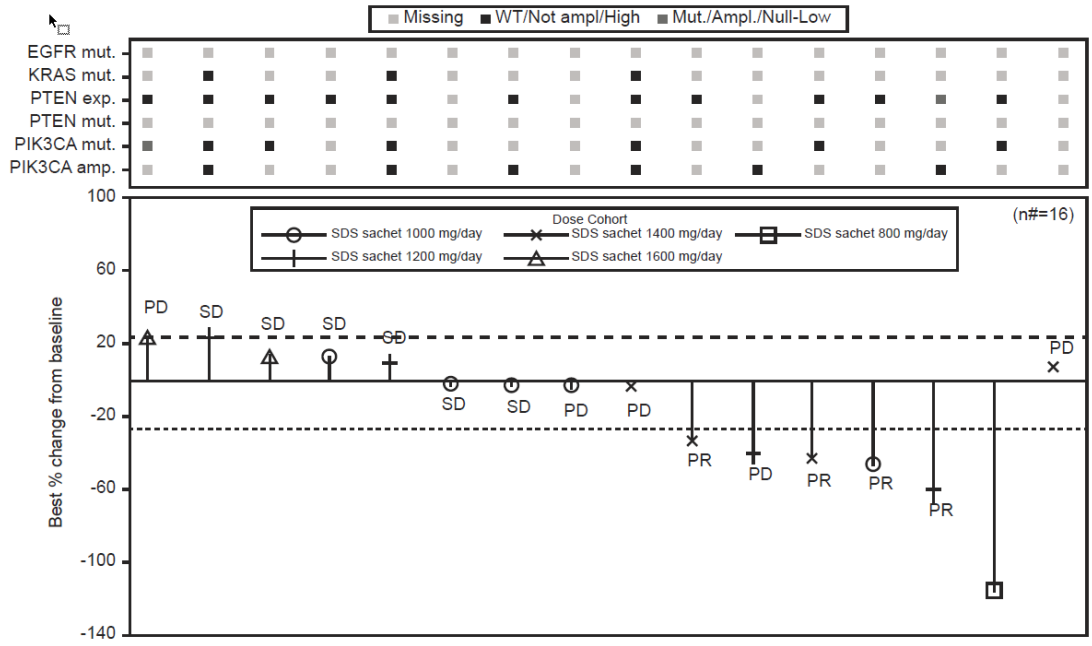

**Supplementary Fig. 2** Scans at baseline and the end of cycle 4 for a patient with PR

Patient 0101-00802 had HER2+ aBC with locally assessed PI3K pathway alteration (*PIK3CA* mutation).

Baseline

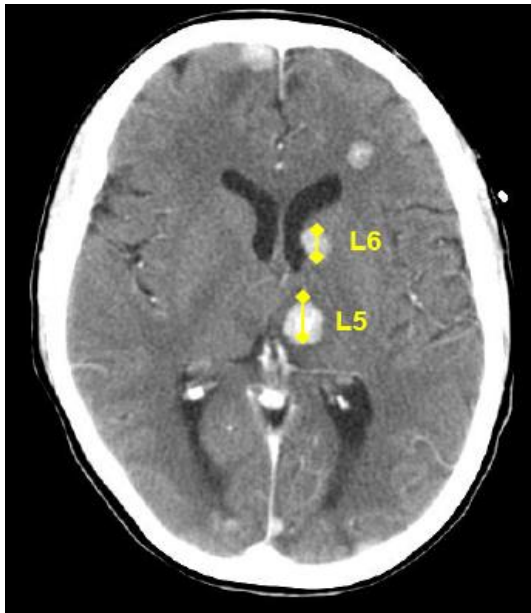

Cycle 4 day 28

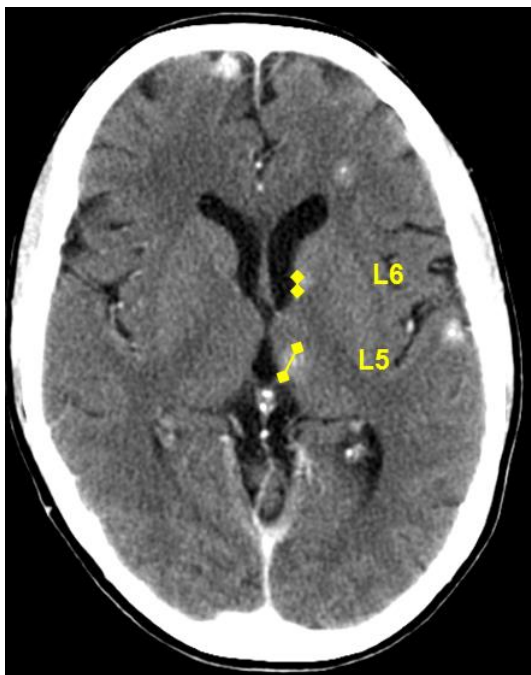

| Assessment                         |    | Baseline, mm | C4D28, mm |
|------------------------------------|----|--------------|-----------|
| BRAIN. Left thalamic nodule        | L5 | 15.2         | 10.0      |
| BRAIN. Left periventricular nodule | L6 | 11.0         | 7.0       |
